# Supplementary material for: Ecological associations of the coastal marsh periwinkle snail Littoraria irrorata: field and laboratory evidence of vegetation habitat preferences
Source: PeerJ. 2025 Mar 12;13:e19071. doi: 10.7717/peerj.19071 (PMC11910147; doi:10.7717/peerj.19071)
Supplement: Supplemental Information 5 — Rows indicate data from experimental trials testing preference patterns for snails. Replicate-the replicate number for each unique treatment. Treatment-comparison of plant material (G=green, Y=yellow, B=brown) or species (Sa=Spartina alterniflora, Sp=Spartina patens, Ds=Distichlis spicata, Jr=Juncus roemerianus). Preference-the area of interest in the trial (on, Near, No pref) for each potential choice (A being the first listed choice and B being the second listed choice). Day or Night First –start time of trial observations (day or night). Daytime or Nighttime Period –indicates whether the given row corresponds to observations during the simulated daytime (6 hours), or during the simulated nighttime (6 hours), portion of the trial. Proportion Time –the proportion of time occupied in the Treatment and Preference area of interest indicated in the other columns of the row. [file peerj-13-19071-s005.xlsx]

## Sheet: ExperimentalData
Replicate	Treatment	Preference	Day or Night First	Daytime or Nighttime Period	Proportion Time
1	G v Y	On A	Day	Day	0.0294118
1	G v Y	Near A	Day	Day	0.107843
1	G v Y	No pref	Day	Day	0.552941
1	G v Y	Near B	Day	Day	0.309804
1	G v Y	On B	Day	Day	0
1	G v Y	On A	Day	Night	0.118644
1	G v Y	Near A	Day	Night	0.0480226
1	G v Y	No pref	Day	Night	0.666667
1	G v Y	Near B	Day	Night	0.166667
1	G v Y	On B	Day	Night	0
2	G v Y	On A	Night	Day	0.0337838
2	G v Y	Near A	Night	Day	0.222973
2	G v Y	No pref	Night	Day	0.0202703
2	G v Y	Near B	Night	Day	0.195946
2	G v Y	On B	Night	Day	0.527027
2	G v Y	On A	Night	Night	0
2	G v Y	Near A	Night	Night	0.166667
2	G v Y	No pref	Night	Night	0.271429
2	G v Y	Near B	Night	Night	0.333333
2	G v Y	On B	Night	Night	0.228571
3	G v Y	On A	Day	Day	0.0166667
3	G v Y	Near A	Day	Day	0.233333
3	G v Y	No pref	Day	Day	0.733333
3	G v Y	Near B	Day	Day	0.0166667
3	G v Y	On B	Day	Day	0
3	G v Y	On A	Day	Night	0.0175439
3	G v Y	Near A	Day	Night	0.232456
3	G v Y	No pref	Day	Night	0.345029
3	G v Y	Near B	Day	Night	0.236842
3	G v Y	On B	Day	Night	0.168129
4	G v Y	On A	Day	Day	0
4	G v Y	Near A	Day	Day	0.301802
4	G v Y	No pref	Day	Day	0.698198
4	G v Y	Near B	Day	Day	0
4	G v Y	On B	Day	Day	0
4	G v Y	On A	Day	Night	0.029595
4	G v Y	Near A	Day	Night	0.361371
4	G v Y	No pref	Day	Night	0.288162
4	G v Y	Near B	Day	Night	0.238318
4	G v Y	On B	Day	Night	0.0825545
5	G v Y	On A	Day	Day	0
5	G v Y	Near A	Day	Day	0.0913242
5	G v Y	No pref	Day	Day	0.705479
5	G v Y	Near B	Day	Day	0.157534
5	G v Y	On B	Day	Day	0.0456621
5	G v Y	On A	Day	Night	0.0704225
5	G v Y	Near A	Day	Night	0.35446
5	G v Y	No pref	Day	Night	0.239437
5	G v Y	Near B	Day	Night	0.00234742
5	G v Y	On B	Day	Night	0.333333
6	G v Y	On A	Night	Day	0
6	G v Y	Near A	Night	Day	0.157143
6	G v Y	No pref	Night	Day	0.0142857
6	G v Y	Near B	Night	Day	0.616667
6	G v Y	On B	Night	Day	0.211905
6	G v Y	On A	Night	Night	0.036036
6	G v Y	Near A	Night	Night	0.0833333
6	G v Y	No pref	Night	Night	0.0990991
6	G v Y	Near B	Night	Night	0.601351
6	G v Y	On B	Night	Night	0.18018
7	G v Y	On A	Night	Day	0.00714286
7	G v Y	Near A	Night	Day	0.188095
7	G v Y	No pref	Night	Day	0.178571
7	G v Y	Near B	Night	Day	0.435714
7	G v Y	On B	Night	Day	0.190476
7	G v Y	On A	Night	Night	0.0405405
7	G v Y	Near A	Night	Night	0.349099
7	G v Y	No pref	Night	Night	0.193694
7	G v Y	Near B	Night	Night	0.385135
7	G v Y	On B	Night	Night	0.0315315
8	G v Y	On A	Day	Day	0.00660793
8	G v Y	Near A	Day	Day	0.132159
8	G v Y	No pref	Day	Day	0.455947
8	G v Y	Near B	Day	Day	0.372247
8	G v Y	On B	Day	Day	0.0330396
8	G v Y	On A	Day	Night	0
8	G v Y	Near A	Day	Night	0.4
8	G v Y	No pref	Day	Night	0.2
8	G v Y	Near B	Day	Night	0.4
8	G v Y	On B	Day	Night	0
9	G v Y	On A	Night	Day	0
9	G v Y	Near A	Night	Day	0.00497512
9	G v Y	No pref	Night	Day	0.825871
9	G v Y	Near B	Night	Day	0.0522388
9	G v Y	On B	Night	Day	0.116915
9	G v Y	On A	Night	Night	0
9	G v Y	Near A	Night	Night	0.0627706
9	G v Y	No pref	Night	Night	0.725108
9	G v Y	Near B	Night	Night	0.164502
9	G v Y	On B	Night	Night	0.047619
10	G v Y	On A	Night	Day	0
10	G v Y	Near A	Night	Day	0.114155
10	G v Y	No pref	Night	Day	0.0205479
10	G v Y	Near B	Night	Day	0.353881
10	G v Y	On B	Night	Day	0.511416
10	G v Y	On A	Night	Night	0
10	G v Y	Near A	Night	Night	0.0352113
10	G v Y	No pref	Night	Night	0.748826
10	G v Y	Near B	Night	Night	0.0798122
10	G v Y	On B	Night	Night	0.13615
1	G v B	On A	Day	Day	0.0251142
1	G v B	Near A	Day	Day	0.383562
1	G v B	No pref	Day	Day	0.422374
1	G v B	Near B	Day	Day	0.0593607
1	G v B	On B	Day	Day	0.109589
1	G v B	On A	Day	Night	0
1	G v B	Near A	Day	Night	0.204225
1	G v B	No pref	Day	Night	0.424883
1	G v B	Near B	Day	Night	0.319249
1	G v B	On B	Day	Night	0.0516432
2	G v B	On A	Night	Day	0.0482456
2	G v B	Near A	Night	Day	0.368421
2	G v B	No pref	Night	Day	0.322368
2	G v B	Near B	Night	Day	0.0942982
2	G v B	On B	Night	Day	0.166667
2	G v B	On A	Night	Night	0.144608
2	G v B	Near A	Night	Night	0.262255
2	G v B	No pref	Night	Night	0.230392
2	G v B	Near B	Night	Night	0.25
2	G v B	On B	Night	Night	0.112745
3	G v B	On A	Day	Day	0.00714286
3	G v B	Near A	Day	Day	0.0142857
3	G v B	No pref	Day	Day	0.22619
3	G v B	Near B	Day	Day	0.733333
3	G v B	On B	Day	Day	0.0190476
3	G v B	On A	Day	Night	0.0202703
3	G v B	Near A	Day	Night	0.31982
3	G v B	No pref	Day	Night	0.0990991
3	G v B	Near B	Day	Night	0.531532
3	G v B	On B	Day	Night	0.0292793
4	G v B	On A	Day	Day	0
4	G v B	Near A	Day	Day	0
4	G v B	No pref	Day	Day	0.981982
4	G v B	Near B	Day	Day	0.018018
4	G v B	On B	Day	Day	0
4	G v B	On A	Day	Night	0.0249221
4	G v B	Near A	Day	Night	0.133956
4	G v B	No pref	Day	Night	0.423676
4	G v B	Near B	Day	Night	0.303738
4	G v B	On B	Day	Night	0.113707
5	G v B	On A	Day	Day	0.0112613
5	G v B	Near A	Day	Day	0.0337838
5	G v B	No pref	Day	Day	0.677928
5	G v B	Near B	Day	Day	0.209459
5	G v B	On B	Day	Day	0.0675676
5	G v B	On A	Day	Night	0.2
5	G v B	Near A	Day	Night	0.211905
5	G v B	No pref	Day	Night	0.178571
5	G v B	Near B	Day	Night	0.409524
5	G v B	On B	Day	Night	0
6	G v B	On A	Night	Day	0.0456989
6	G v B	Near A	Night	Day	0.301075
6	G v B	No pref	Night	Day	0.352151
6	G v B	Near B	Night	Day	0.094086
6	G v B	On B	Night	Day	0.206989
6	G v B	On A	Night	Night	0.00406504
6	G v B	Near A	Night	Night	0.128049
6	G v B	No pref	Night	Night	0.640244
6	G v B	Near B	Night	Night	0.144309
6	G v B	On B	Night	Night	0.0833333
7	G v B	On A	Night	Day	0.0799087
7	G v B	Near A	Night	Day	0.47032
7	G v B	No pref	Night	Day	0.150685
7	G v B	Near B	Night	Day	0.141553
7	G v B	On B	Night	Day	0.157534
7	G v B	On A	Night	Night	0.0586854
7	G v B	Near A	Night	Night	0.370892
7	G v B	No pref	Night	Night	0.330986
7	G v B	Near B	Night	Night	0.028169
7	G v B	On B	Night	Night	0.211268
8	G v B	On A	Day	Day	0
8	G v B	Near A	Day	Day	0.121212
8	G v B	No pref	Day	Day	0.270563
8	G v B	Near B	Day	Day	0.322511
8	G v B	On B	Day	Day	0.285714
8	G v B	On A	Day	Night	0
8	G v B	Near A	Day	Night	0.166667
8	G v B	No pref	Day	Night	0.166667
8	G v B	Near B	Day	Night	0.333333
8	G v B	On B	Day	Night	0.333333
9	G v B	On A	Night	Day	0.0555556
9	G v B	Near A	Night	Day	0.282828
9	G v B	No pref	Night	Day	0.103535
9	G v B	Near B	Night	Day	0.184343
9	G v B	On B	Night	Day	0.373737
9	G v B	On A	Night	Night	0.0128205
9	G v B	Near A	Night	Night	0.128205
9	G v B	No pref	Night	Night	0.508547
9	G v B	Near B	Night	Night	0.211538
9	G v B	On B	Night	Night	0.138889
10	G v B	On A	Night	Day	0.07277
10	G v B	Near A	Night	Day	0.150235
10	G v B	No pref	Night	Day	0.349765
10	G v B	Near B	Night	Day	0.316901
10	G v B	On B	Night	Day	0.110329
10	G v B	On A	Night	Night	0
10	G v B	Near A	Night	Night	0.0753425
10	G v B	No pref	Night	Night	0.703196
10	G v B	Near B	Night	Night	0.221461
10	G v B	On B	Night	Night	0
1	Y v B	On A	Day	Day	0.0707763
1	Y v B	Near A	Day	Day	0.333333
1	Y v B	No pref	Day	Day	0.347032
1	Y v B	Near B	Day	Day	0.200913
1	Y v B	On B	Day	Day	0.0479452
1	Y v B	On A	Day	Night	0.00704225
1	Y v B	Near A	Day	Night	0.446009
1	Y v B	No pref	Day	Night	0.0915493
1	Y v B	Near B	Day	Night	0.455399
1	Y v B	On B	Day	Night	0
2	Y v B	On A	Night	Day	0.632883
2	Y v B	Near A	Night	Day	0.279279
2	Y v B	No pref	Night	Day	0.0810811
2	Y v B	Near B	Night	Day	0.00675676
2	Y v B	On B	Night	Day	0
2	Y v B	On A	Night	Night	0.245238
2	Y v B	Near A	Night	Night	0.347619
2	Y v B	No pref	Night	Night	0.307143
2	Y v B	Near B	Night	Night	0.097619
2	Y v B	On B	Night	Night	0.00238095
3	Y v B	On A	Day	Day	0
3	Y v B	Near A	Day	Day	0.222222
3	Y v B	No pref	Day	Day	0.701389
3	Y v B	Near B	Day	Day	0.0439815
3	Y v B	On B	Day	Day	0.0324074
3	Y v B	On A	Day	Night	0.113426
3	Y v B	Near A	Day	Night	0.351852
3	Y v B	No pref	Day	Night	0.199074
3	Y v B	Near B	Day	Night	0.171296
3	Y v B	On B	Day	Night	0.164352
4	Y v B	On A	Day	Day	0.0258216
4	Y v B	Near A	Day	Day	0.0164319
4	Y v B	No pref	Day	Day	0.34507
4	Y v B	Near B	Day	Day	0.575117
4	Y v B	On B	Day	Day	0.0375587
4	Y v B	On A	Day	Night	0.043379
4	Y v B	Near A	Day	Night	0.0296804
4	Y v B	No pref	Day	Night	0.0753425
4	Y v B	Near B	Day	Night	0.650685
4	Y v B	On B	Day	Night	0.200913
5	Y v B	On A	Day	Day	0.137387
5	Y v B	Near A	Day	Day	0.0135135
5	Y v B	No pref	Day	Day	0.0878378
5	Y v B	Near B	Day	Day	0.664414
5	Y v B	On B	Day	Day	0.0968468
5	Y v B	On A	Day	Night	0.166667
5	Y v B	Near A	Day	Night	0
5	Y v B	No pref	Day	Night	0
5	Y v B	Near B	Day	Night	0.666667
5	Y v B	On B	Day	Night	0.166667
6	Y v B	On A	Night	Day	0.328638
6	Y v B	Near A	Night	Day	0.103286
6	Y v B	No pref	Night	Day	0.457746
6	Y v B	Near B	Night	Day	0.0469484
6	Y v B	On B	Night	Day	0.0633803
6	Y v B	On A	Night	Night	0.0114155
6	Y v B	Near A	Night	Night	0.267123
6	Y v B	No pref	Night	Night	0.465753
6	Y v B	Near B	Night	Night	0.166667
6	Y v B	On B	Night	Night	0.0890411
7	Y v B	On A	Night	Day	0.159722
7	Y v B	Near A	Night	Day	0.506944
7	Y v B	No pref	Night	Day	0
7	Y v B	Near B	Night	Day	0.037037
7	Y v B	On B	Night	Day	0.296296
7	Y v B	On A	Night	Night	0
7	Y v B	Near A	Night	Night	0.571759
7	Y v B	No pref	Night	Night	0.12963
7	Y v B	Near B	Night	Night	0.0532407
7	Y v B	On B	Night	Night	0.24537
8	Y v B	On A	Day	Day	0.0151515
8	Y v B	Near A	Day	Day	0.235931
8	Y v B	No pref	Day	Day	0.5671
8	Y v B	Near B	Day	Day	0.170996
8	Y v B	On B	Day	Day	0.0108225
8	Y v B	On A	Day	Night	0.166667
8	Y v B	Near A	Day	Night	0.0970149
8	Y v B	No pref	Day	Night	0.569652
8	Y v B	Near B	Day	Night	0.166667
8	Y v B	On B	Day	Night	0
9	Y v B	On A	Night	Day	0.393035
9	Y v B	Near A	Night	Day	0.079602
9	Y v B	No pref	Night	Day	0.139303
9	Y v B	Near B	Night	Day	0.298507
9	Y v B	On B	Night	Day	0.0895522
9	Y v B	On A	Night	Night	0.12987
9	Y v B	Near A	Night	Night	0.149351
9	Y v B	No pref	Night	Night	0.502165
9	Y v B	Near B	Night	Night	0.140693
9	Y v B	On B	Night	Night	0.0779221
10	Y v B	On A	Night	Day	0.0958904
10	Y v B	Near A	Night	Day	0.269406
10	Y v B	No pref	Night	Day	0.184932
10	Y v B	Near B	Night	Day	0.239726
10	Y v B	On B	Night	Day	0.210046
10	Y v B	On A	Night	Night	0
10	Y v B	Near A	Night	Night	0.197183
10	Y v B	No pref	Night	Night	0.347418
10	Y v B	Near B	Night	Night	0.321596
10	Y v B	On B	Night	Night	0.133803
1	Sa v Sp	On A	Day	Day	0.114943
1	Sa v Sp	Near A	Day	Day	0.333333
1	Sa v Sp	No pref	Day	Day	0.522989
1	Sa v Sp	Near B	Day	Day	0.0287356
1	Sa v Sp	On B	Day	Day	0
1	Sa v Sp	On A	Day	Night	0.178363
1	Sa v Sp	Near A	Day	Night	0.312865
1	Sa v Sp	No pref	Day	Night	0.342105
1	Sa v Sp	Near B	Day	Night	0.166667
1	Sa v Sp	On B	Day	Night	0
2	Sa v Sp	On A	Night	Day	0.166667
2	Sa v Sp	Near A	Night	Day	0.778539
2	Sa v Sp	No pref	Night	Day	0.0273973
2	Sa v Sp	Near B	Night	Day	0.0114155
2	Sa v Sp	On B	Night	Day	0.0159817
2	Sa v Sp	On A	Night	Night	0.140845
2	Sa v Sp	Near A	Night	Night	0.626761
2	Sa v Sp	No pref	Night	Night	0.220657
2	Sa v Sp	Near B	Night	Night	0.0117371
2	Sa v Sp	On B	Night	Night	0
3	Sa v Sp	On A	Day	Day	0
3	Sa v Sp	Near A	Day	Day	0.155556
3	Sa v Sp	No pref	Day	Day	0.461111
3	Sa v Sp	Near B	Day	Day	0.383333
3	Sa v Sp	On B	Day	Day	0
3	Sa v Sp	On A	Day	Night	0.00146199
3	Sa v Sp	Near A	Day	Night	0.28655
3	Sa v Sp	No pref	Day	Night	0.409357
3	Sa v Sp	Near B	Day	Night	0.302632
3	Sa v Sp	On B	Day	Night	0
4	Sa v Sp	On A	Day	Day	0.0182648
4	Sa v Sp	Near A	Day	Day	0.488584
4	Sa v Sp	No pref	Day	Day	0.378995
4	Sa v Sp	Near B	Day	Day	0.105023
4	Sa v Sp	On B	Day	Day	0.00913242
4	Sa v Sp	On A	Day	Night	0.0539906
4	Sa v Sp	Near A	Day	Night	0.0422535
4	Sa v Sp	No pref	Day	Night	0.187793
4	Sa v Sp	Near B	Day	Night	0.713615
4	Sa v Sp	On B	Day	Night	0.00234742
5	Sa v Sp	On A	Day	Day	0.127854
5	Sa v Sp	Near A	Day	Day	0.116438
5	Sa v Sp	No pref	Day	Day	0.484018
5	Sa v Sp	Near B	Day	Day	0.269406
5	Sa v Sp	On B	Day	Day	0.00228311
5	Sa v Sp	On A	Day	Night	0.056338
5	Sa v Sp	Near A	Day	Night	0.286385
5	Sa v Sp	No pref	Day	Night	0.34507
5	Sa v Sp	Near B	Day	Night	0.312207
5	Sa v Sp	On B	Day	Night	0
6	Sa v Sp	On A	Night	Day	0.0119048
6	Sa v Sp	Near A	Night	Day	0.00238095
6	Sa v Sp	No pref	Night	Day	0.688095
6	Sa v Sp	Near B	Night	Day	0.297619
6	Sa v Sp	On B	Night	Day	0
6	Sa v Sp	On A	Night	Night	0
6	Sa v Sp	Near A	Night	Night	0
6	Sa v Sp	No pref	Night	Night	0.657658
6	Sa v Sp	Near B	Night	Night	0.342342
6	Sa v Sp	On B	Night	Night	0
7	Sa v Sp	On A	Night	Day	0.115741
7	Sa v Sp	Near A	Night	Day	0.423611
7	Sa v Sp	No pref	Night	Day	0.0138889
7	Sa v Sp	Near B	Night	Day	0.43287
7	Sa v Sp	On B	Night	Day	0.0138889
7	Sa v Sp	On A	Night	Night	0.0347222
7	Sa v Sp	Near A	Night	Night	0.476852
7	Sa v Sp	No pref	Night	Night	0.155093
7	Sa v Sp	Near B	Night	Night	0.333333
7	Sa v Sp	On B	Night	Night	0
8	Sa v Sp	On A	Day	Day	0.0307018
8	Sa v Sp	Near A	Day	Day	0.348684
8	Sa v Sp	No pref	Day	Day	0.162281
8	Sa v Sp	Near B	Day	Day	0.436404
8	Sa v Sp	On B	Day	Day	0.0219298
8	Sa v Sp	On A	Day	Night	0.00735294
8	Sa v Sp	Near A	Day	Night	0.382353
8	Sa v Sp	No pref	Day	Night	0.0465686
8	Sa v Sp	Near B	Day	Night	0.563725
8	Sa v Sp	On B	Day	Night	0
9	Sa v Sp	On A	Night	Day	0.148402
9	Sa v Sp	Near A	Night	Day	0.287671
9	Sa v Sp	No pref	Night	Day	0.180365
9	Sa v Sp	Near B	Night	Day	0.374429
9	Sa v Sp	On B	Night	Day	0.00913242
9	Sa v Sp	On A	Night	Night	0.0492958
9	Sa v Sp	Near A	Night	Night	0.100939
9	Sa v Sp	No pref	Night	Night	0.652582
9	Sa v Sp	Near B	Night	Night	0.180751
9	Sa v Sp	On B	Night	Night	0.0164319
10	Sa v Sp	On A	Night	Day	0.148541
10	Sa v Sp	Near A	Night	Day	0.33687
10	Sa v Sp	No pref	Night	Day	0.0636605
10	Sa v Sp	Near B	Night	Day	0.437666
10	Sa v Sp	On B	Night	Day	0.0132626
10	Sa v Sp	On A	Night	Night	0.0182648
10	Sa v Sp	Near A	Night	Night	0.043379
10	Sa v Sp	No pref	Night	Night	0.136986
10	Sa v Sp	Near B	Night	Night	0.80137
10	Sa v Sp	On B	Night	Night	0
1	Sa v Ds	On A	Day	Day	0
1	Sa v Ds	Near A	Day	Day	0.0137255
1	Sa v Ds	No pref	Day	Day	0.55098
1	Sa v Ds	Near B	Day	Day	0.421569
1	Sa v Ds	On B	Day	Day	0.0137255
1	Sa v Ds	On A	Day	Night	0.0480226
1	Sa v Ds	Near A	Day	Night	0.0819209
1	Sa v Ds	No pref	Day	Night	0.186441
1	Sa v Ds	Near B	Day	Night	0.683616
1	Sa v Ds	On B	Day	Night	0
2	Sa v Ds	On A	Night	Day	0.121005
2	Sa v Ds	Near A	Night	Day	0.118721
2	Sa v Ds	No pref	Night	Day	0.157534
2	Sa v Ds	Near B	Night	Day	0.575342
2	Sa v Ds	On B	Night	Day	0.0273973
2	Sa v Ds	On A	Night	Night	0
2	Sa v Ds	Near A	Night	Night	0.00469484
2	Sa v Ds	No pref	Night	Night	0.633803
2	Sa v Ds	Near B	Night	Night	0.361502
2	Sa v Ds	On B	Night	Night	0
3	Sa v Ds	On A	Day	Day	0
3	Sa v Ds	Near A	Day	Day	0.132184
3	Sa v Ds	No pref	Day	Day	0.867816
3	Sa v Ds	Near B	Day	Day	0
3	Sa v Ds	On B	Day	Day	0
3	Sa v Ds	On A	Day	Night	0
3	Sa v Ds	Near A	Day	Night	0.255072
3	Sa v Ds	No pref	Day	Night	0.450725
3	Sa v Ds	Near B	Day	Night	0.294203
3	Sa v Ds	On B	Day	Night	0
4	Sa v Ds	On A	Day	Day	0.037037
4	Sa v Ds	Near A	Day	Day	0.650463
4	Sa v Ds	No pref	Day	Day	0.3125
4	Sa v Ds	Near B	Day	Day	0
4	Sa v Ds	On B	Day	Day	0
4	Sa v Ds	On A	Day	Night	0.0138889
4	Sa v Ds	Near A	Day	Night	0.789352
4	Sa v Ds	No pref	Day	Night	0.138889
4	Sa v Ds	Near B	Day	Night	0.0439815
4	Sa v Ds	On B	Day	Night	0.0138889
5	Sa v Ds	On A	Day	Day	0.0730594
5	Sa v Ds	Near A	Day	Day	0.0159817
5	Sa v Ds	No pref	Day	Day	0.593607
5	Sa v Ds	Near B	Day	Day	0.310502
5	Sa v Ds	On B	Day	Day	0.00684931
5	Sa v Ds	On A	Day	Night	0.00704225
5	Sa v Ds	Near A	Day	Night	0
5	Sa v Ds	No pref	Day	Night	0.7277
5	Sa v Ds	Near B	Day	Night	0.265258
5	Sa v Ds	On B	Day	Night	0
6	Sa v Ds	On A	Night	Day	0.124413
6	Sa v Ds	Near A	Night	Day	0.453052
6	Sa v Ds	No pref	Night	Day	0.122066
6	Sa v Ds	Near B	Night	Day	0.295775
6	Sa v Ds	On B	Night	Day	0.00469484
6	Sa v Ds	On A	Night	Night	0
6	Sa v Ds	Near A	Night	Night	0.0479452
6	Sa v Ds	No pref	Night	Night	0.947489
6	Sa v Ds	Near B	Night	Night	0.00456621
6	Sa v Ds	On B	Night	Night	0
7	Sa v Ds	On A	Night	Day	0.0166667
7	Sa v Ds	Near A	Night	Day	0.392857
7	Sa v Ds	No pref	Night	Day	0.414286
7	Sa v Ds	Near B	Night	Day	0.140476
7	Sa v Ds	On B	Night	Day	0.0357143
7	Sa v Ds	On A	Night	Night	0.00225225
7	Sa v Ds	Near A	Night	Night	0.322072
7	Sa v Ds	No pref	Night	Night	0.641892
7	Sa v Ds	Near B	Night	Night	0.0315315
7	Sa v Ds	On B	Night	Night	0.00225225
8	Sa v Ds	On A	Day	Day	0.0163551
8	Sa v Ds	Near A	Day	Day	0.434579
8	Sa v Ds	No pref	Day	Day	0.13785
8	Sa v Ds	Near B	Day	Day	0.404206
8	Sa v Ds	On B	Day	Day	0.00700935
8	Sa v Ds	On A	Day	Night	0
8	Sa v Ds	Near A	Day	Night	0.578704
8	Sa v Ds	No pref	Day	Night	0.1875
8	Sa v Ds	Near B	Day	Night	0.224537
8	Sa v Ds	On B	Day	Night	0.00925926
9	Sa v Ds	On A	Night	Day	0.130137
9	Sa v Ds	Near A	Night	Day	0.296804
9	Sa v Ds	No pref	Night	Day	0.342466
9	Sa v Ds	Near B	Night	Day	0.200913
9	Sa v Ds	On B	Night	Day	0.0296804
9	Sa v Ds	On A	Night	Night	0
9	Sa v Ds	Near A	Night	Night	0.143192
9	Sa v Ds	No pref	Night	Night	0.593897
9	Sa v Ds	Near B	Night	Night	0.262911
9	Sa v Ds	On B	Night	Night	0
10	Sa v Ds	On A	Night	Day	0.0533333
10	Sa v Ds	Near A	Night	Day	0.466667
10	Sa v Ds	No pref	Night	Day	0.0826667
10	Sa v Ds	Near B	Night	Day	0.397333
10	Sa v Ds	On B	Night	Day	0
10	Sa v Ds	On A	Night	Night	0
10	Sa v Ds	Near A	Night	Night	0.300469
10	Sa v Ds	No pref	Night	Night	0.476526
10	Sa v Ds	Near B	Night	Night	0.223005
10	Sa v Ds	On B	Night	Night	0
1	Sa v Jr	On A	Day	Day	0.0185185
1	Sa v Jr	Near A	Day	Day	0.0601852
1	Sa v Jr	No pref	Day	Day	0.175926
1	Sa v Jr	Near B	Day	Day	0.736111
1	Sa v Jr	On B	Day	Day	0.00925926
1	Sa v Jr	On A	Day	Night	0.166667
1	Sa v Jr	Near A	Day	Night	0.0694444
1	Sa v Jr	No pref	Day	Night	0.391204
1	Sa v Jr	Near B	Day	Night	0.372685
1	Sa v Jr	On B	Day	Night	0
2	Sa v Jr	On A	Night	Day	0.0833333
2	Sa v Jr	Near A	Night	Day	0.240991
2	Sa v Jr	No pref	Night	Day	0.175676
2	Sa v Jr	Near B	Night	Day	0.5
2	Sa v Jr	On B	Night	Day	0
2	Sa v Jr	On A	Night	Night	0
2	Sa v Jr	Near A	Night	Night	0.483333
2	Sa v Jr	No pref	Night	Night	0.245238
2	Sa v Jr	Near B	Night	Night	0.271429
2	Sa v Jr	On B	Night	Night	0
3	Sa v Jr	On A	Day	Day	0
3	Sa v Jr	Near A	Day	Day	0.647619
3	Sa v Jr	No pref	Day	Day	0.352381
3	Sa v Jr	Near B	Day	Day	0
3	Sa v Jr	On B	Day	Day	0
3	Sa v Jr	On A	Day	Night	0
3	Sa v Jr	Near A	Day	Night	0.198198
3	Sa v Jr	No pref	Day	Night	0.538288
3	Sa v Jr	Near B	Day	Night	0.263514
3	Sa v Jr	On B	Day	Night	0
4	Sa v Jr	On A	Day	Day	0.263158
4	Sa v Jr	Near A	Day	Day	0.438596
4	Sa v Jr	No pref	Day	Day	0.276316
4	Sa v Jr	Near B	Day	Day	0.0219298
4	Sa v Jr	On B	Day	Day	0
4	Sa v Jr	On A	Day	Night	0.0235849
4	Sa v Jr	Near A	Day	Night	0.463836
4	Sa v Jr	No pref	Day	Night	0.261006
4	Sa v Jr	Near B	Day	Night	0.251572
4	Sa v Jr	On B	Day	Night	0
5	Sa v Jr	On A	Day	Day	0
5	Sa v Jr	Near A	Day	Day	0.138889
5	Sa v Jr	No pref	Day	Day	0.731481
5	Sa v Jr	Near B	Day	Day	0.115741
5	Sa v Jr	On B	Day	Day	0.0138889
5	Sa v Jr	On A	Day	Night	0
5	Sa v Jr	Near A	Day	Night	0.231481
5	Sa v Jr	No pref	Day	Night	0.666667
5	Sa v Jr	Near B	Day	Night	0.099537
5	Sa v Jr	On B	Day	Night	0.00231482
6	Sa v Jr	On A	Night	Day	0.0188172
6	Sa v Jr	Near A	Night	Day	0.465054
6	Sa v Jr	No pref	Night	Day	0.357527
6	Sa v Jr	Near B	Night	Day	0.0564516
6	Sa v Jr	On B	Night	Day	0.102151
6	Sa v Jr	On A	Night	Night	0.00406504
6	Sa v Jr	Near A	Night	Night	0.140244
6	Sa v Jr	No pref	Night	Night	0.569106
6	Sa v Jr	Near B	Night	Night	0.22561
6	Sa v Jr	On B	Night	Night	0.0609756
7	Sa v Jr	On A	Night	Day	0.0140845
7	Sa v Jr	Near A	Night	Day	0.0164319
7	Sa v Jr	No pref	Night	Day	0.617371
7	Sa v Jr	Near B	Night	Day	0.187793
7	Sa v Jr	On B	Night	Day	0.164319
7	Sa v Jr	On A	Night	Night	0
7	Sa v Jr	Near A	Night	Night	0.0114155
7	Sa v Jr	No pref	Night	Night	0.694064
7	Sa v Jr	Near B	Night	Night	0.292237
7	Sa v Jr	On B	Night	Night	0.00228311
8	Sa v Jr	On A	Day	Day	0.00234742
8	Sa v Jr	Near A	Day	Day	0.316901
8	Sa v Jr	No pref	Day	Day	0.361502
8	Sa v Jr	Near B	Day	Day	0.201878
8	Sa v Jr	On B	Day	Day	0.117371
8	Sa v Jr	On A	Day	Night	0
8	Sa v Jr	Near A	Day	Night	0
8	Sa v Jr	No pref	Day	Night	0
8	Sa v Jr	Near B	Day	Night	0
8	Sa v Jr	On B	Day	Night	0
9	Sa v Jr	On A	Night	Day	0.00925926
9	Sa v Jr	Near A	Night	Day	0.282407
9	Sa v Jr	No pref	Night	Day	0.638889
9	Sa v Jr	Near B	Night	Day	0.0625
9	Sa v Jr	On B	Night	Day	0.00694444
9	Sa v Jr	On A	Night	Night	0
9	Sa v Jr	Near A	Night	Night	0.3125
9	Sa v Jr	No pref	Night	Night	0.50463
9	Sa v Jr	Near B	Night	Night	0.0555556
9	Sa v Jr	On B	Night	Night	0.127315
10	Sa v Jr	On A	Night	Day	0.0671296
10	Sa v Jr	Near A	Night	Day	0.310185
10	Sa v Jr	No pref	Night	Day	0.155093
10	Sa v Jr	Near B	Night	Day	0.416667
10	Sa v Jr	On B	Night	Day	0.0509259
10	Sa v Jr	On A	Night	Night	0
10	Sa v Jr	Near A	Night	Night	0.173611
10	Sa v Jr	No pref	Night	Night	0.564815
10	Sa v Jr	Near B	Night	Night	0.138889
10	Sa v Jr	On B	Night	Night	0.122685
1	Sp v Ds	On A	Day	Day	0.00387597
1	Sp v Ds	Near A	Day	Day	0.391473
1	Sp v Ds	No pref	Day	Day	0.513566
1	Sp v Ds	Near B	Day	Day	0.0426357
1	Sp v Ds	On B	Day	Day	0.0484496
1	Sp v Ds	On A	Day	Night	0
1	Sp v Ds	Near A	Day	Night	0.201149
1	Sp v Ds	No pref	Day	Night	0.511494
1	Sp v Ds	Near B	Day	Night	0.132184
1	Sp v Ds	On B	Day	Night	0.155172
2	Sp v Ds	On A	Night	Day	0
2	Sp v Ds	Near A	Night	Day	0.0532407
2	Sp v Ds	No pref	Night	Day	0.511574
2	Sp v Ds	Near B	Night	Day	0.435185
2	Sp v Ds	On B	Night	Day	0
2	Sp v Ds	On A	Night	Night	0
2	Sp v Ds	Near A	Night	Night	0.189815
2	Sp v Ds	No pref	Night	Night	0.451389
2	Sp v Ds	Near B	Night	Night	0.358796
2	Sp v Ds	On B	Night	Night	0
3	Sp v Ds	On A	Day	Day	0
3	Sp v Ds	Near A	Day	Day	0.0722222
3	Sp v Ds	No pref	Day	Day	0.522222
3	Sp v Ds	Near B	Day	Day	0.405556
3	Sp v Ds	On B	Day	Day	0
3	Sp v Ds	On A	Day	Night	0
3	Sp v Ds	Near A	Day	Night	0.364035
3	Sp v Ds	No pref	Day	Night	0.176901
3	Sp v Ds	Near B	Day	Night	0.44152
3	Sp v Ds	On B	Day	Night	0.0175439
4	Sp v Ds	On A	Day	Day	0
4	Sp v Ds	Near A	Day	Day	0.421053
4	Sp v Ds	No pref	Day	Day	0.578947
4	Sp v Ds	Near B	Day	Day	0
4	Sp v Ds	On B	Day	Day	0
4	Sp v Ds	On A	Day	Night	0
4	Sp v Ds	Near A	Day	Night	0.438679
4	Sp v Ds	No pref	Day	Night	0.407233
4	Sp v Ds	Near B	Day	Night	0.154088
4	Sp v Ds	On B	Day	Night	0
5	Sp v Ds	On A	Day	Day	0.00462963
5	Sp v Ds	Near A	Day	Day	0.539352
5	Sp v Ds	No pref	Day	Day	0.215278
5	Sp v Ds	Near B	Day	Day	0.217593
5	Sp v Ds	On B	Day	Day	0.0231481
5	Sp v Ds	On A	Day	Night	0
5	Sp v Ds	Near A	Day	Night	0.333333
5	Sp v Ds	No pref	Day	Night	0.266204
5	Sp v Ds	Near B	Day	Night	0.296296
5	Sp v Ds	On B	Day	Night	0.104167
6	Sp v Ds	On A	Night	Day	0
6	Sp v Ds	Near A	Night	Day	0.247312
6	Sp v Ds	No pref	Night	Day	0.438172
6	Sp v Ds	Near B	Night	Day	0.287634
6	Sp v Ds	On B	Night	Day	0.0268817
6	Sp v Ds	On A	Night	Night	0
6	Sp v Ds	Near A	Night	Night	0.0243902
6	Sp v Ds	No pref	Night	Night	0.396341
6	Sp v Ds	Near B	Night	Night	0.579268
6	Sp v Ds	On B	Night	Night	0
7	Sp v Ds	On A	Night	Day	0
7	Sp v Ds	Near A	Night	Day	0.213615
7	Sp v Ds	No pref	Night	Day	0.0399061
7	Sp v Ds	Near B	Night	Day	0.713615
7	Sp v Ds	On B	Night	Day	0.0328639
7	Sp v Ds	On A	Night	Night	0
7	Sp v Ds	Near A	Night	Night	0.244292
7	Sp v Ds	No pref	Night	Night	0.150685
7	Sp v Ds	Near B	Night	Night	0.598174
7	Sp v Ds	On B	Night	Night	0.00684931
8	Sp v Ds	On A	Day	Day	0.00462963
8	Sp v Ds	Near A	Day	Day	0.0532407
8	Sp v Ds	No pref	Day	Day	0.365741
8	Sp v Ds	Near B	Day	Day	0.576389
8	Sp v Ds	On B	Day	Day	0
8	Sp v Ds	On A	Day	Night	0.0138889
8	Sp v Ds	Near A	Day	Night	0.219907
8	Sp v Ds	No pref	Day	Night	0.229167
8	Sp v Ds	Near B	Day	Night	0.537037
8	Sp v Ds	On B	Day	Night	0
9	Sp v Ds	On A	Night	Day	0.00497512
9	Sp v Ds	Near A	Night	Day	0.0597015
9	Sp v Ds	No pref	Night	Day	0.761194
9	Sp v Ds	Near B	Night	Day	0.174129
9	Sp v Ds	On B	Night	Day	0
9	Sp v Ds	On A	Night	Night	0
9	Sp v Ds	Near A	Night	Night	0
9	Sp v Ds	No pref	Night	Night	0.757576
9	Sp v Ds	Near B	Night	Night	0.242424
9	Sp v Ds	On B	Night	Night	0
10	Sp v Ds	On A	Night	Day	0
10	Sp v Ds	Near A	Night	Day	0.351801
10	Sp v Ds	No pref	Night	Day	0.598338
10	Sp v Ds	Near B	Night	Day	0.0415512
10	Sp v Ds	On B	Night	Day	0.00831025
10	Sp v Ds	On A	Night	Night	0.00469484
10	Sp v Ds	Near A	Night	Night	0.255869
10	Sp v Ds	No pref	Night	Night	0.544601
10	Sp v Ds	Near B	Night	Night	0.169014
10	Sp v Ds	On B	Night	Night	0.0258216
1	Sp v Jr	On A	Day	Day	0.0193798
1	Sp v Jr	Near A	Day	Day	0.129845
1	Sp v Jr	No pref	Day	Day	0.722868
1	Sp v Jr	Near B	Day	Day	0.127907
1	Sp v Jr	On B	Day	Day	0
1	Sp v Jr	On A	Day	Night	0
1	Sp v Jr	Near A	Day	Night	0.278736
1	Sp v Jr	No pref	Day	Night	0.399425
1	Sp v Jr	Near B	Day	Night	0.321839
1	Sp v Jr	On B	Day	Night	0
2	Sp v Jr	On A	Night	Day	0.0247748
2	Sp v Jr	Near A	Night	Day	0.353604
2	Sp v Jr	No pref	Night	Day	0.254505
2	Sp v Jr	Near B	Night	Day	0.358108
2	Sp v Jr	On B	Night	Day	0.00900901
2	Sp v Jr	On A	Night	Night	0
2	Sp v Jr	Near A	Night	Night	0.304762
2	Sp v Jr	No pref	Night	Night	0.354762
2	Sp v Jr	Near B	Night	Night	0.340476
2	Sp v Jr	On B	Night	Night	0
3	Sp v Jr	On A	Day	Day	0
3	Sp v Jr	Near A	Day	Day	0.171429
3	Sp v Jr	No pref	Day	Day	0.797619
3	Sp v Jr	Near B	Day	Day	0.0309524
3	Sp v Jr	On B	Day	Day	0
3	Sp v Jr	On A	Day	Night	0
3	Sp v Jr	Near A	Day	Night	0.326577
3	Sp v Jr	No pref	Day	Night	0.322072
3	Sp v Jr	Near B	Day	Night	0.351351
3	Sp v Jr	On B	Day	Night	0
4	Sp v Jr	On A	Day	Day	0.00231482
4	Sp v Jr	Near A	Day	Day	0.263889
4	Sp v Jr	No pref	Day	Day	0.597222
4	Sp v Jr	Near B	Day	Day	0.136574
4	Sp v Jr	On B	Day	Day	0
4	Sp v Jr	On A	Day	Night	0.00231482
4	Sp v Jr	Near A	Day	Night	0.0393519
4	Sp v Jr	No pref	Day	Night	0.428241
4	Sp v Jr	Near B	Day	Night	0.527778
4	Sp v Jr	On B	Day	Night	0.00231482
5	Sp v Jr	On A	Day	Day	0.036036
5	Sp v Jr	Near A	Day	Day	0.441441
5	Sp v Jr	No pref	Day	Day	0.367117
5	Sp v Jr	Near B	Day	Day	0.155405
5	Sp v Jr	On B	Day	Day	0
5	Sp v Jr	On A	Day	Night	0
5	Sp v Jr	Near A	Day	Night	0.290476
5	Sp v Jr	No pref	Day	Night	0.297619
5	Sp v Jr	Near B	Day	Night	0.411905
5	Sp v Jr	On B	Day	Night	0
6	Sp v Jr	On A	Night	Day	0
6	Sp v Jr	Near A	Night	Day	0.0107527
6	Sp v Jr	No pref	Night	Day	0.0698925
6	Sp v Jr	Near B	Night	Day	0.817204
6	Sp v Jr	On B	Night	Day	0.102151
6	Sp v Jr	On A	Night	Night	0
6	Sp v Jr	Near A	Night	Night	0.0365854
6	Sp v Jr	No pref	Night	Night	0.432927
6	Sp v Jr	Near B	Night	Night	0.530488
6	Sp v Jr	On B	Night	Night	0
7	Sp v Jr	On A	Night	Day	0.047619
7	Sp v Jr	Near A	Night	Day	0.511905
7	Sp v Jr	No pref	Night	Day	0.140476
7	Sp v Jr	Near B	Night	Day	0.3
7	Sp v Jr	On B	Night	Day	0
7	Sp v Jr	On A	Night	Night	0.0135135
7	Sp v Jr	Near A	Night	Night	0.279279
7	Sp v Jr	No pref	Night	Night	0.114155
7	Sp v Jr	Near B	Night	Night	0.594595
7	Sp v Jr	On B	Night	Night	0
8	Sp v Jr	On A	Day	Day	0.0117371
8	Sp v Jr	Near A	Day	Day	0.187793
8	Sp v Jr	No pref	Day	Day	0.349765
8	Sp v Jr	Near B	Day	Day	0.438967
8	Sp v Jr	On B	Day	Day	0.0117371
8	Sp v Jr	On A	Day	Night	0
8	Sp v Jr	Near A	Day	Night	0.474886
8	Sp v Jr	No pref	Day	Night	0.166667
8	Sp v Jr	Near B	Day	Night	0.358447
8	Sp v Jr	On B	Day	Night	0
9	Sp v Jr	On A	Night	Day	0.0616438
9	Sp v Jr	Near A	Night	Day	0.182648
9	Sp v Jr	No pref	Night	Day	0.155251
9	Sp v Jr	Near B	Night	Day	0.584475
9	Sp v Jr	On B	Night	Day	0.0159817
9	Sp v Jr	On A	Night	Night	0
9	Sp v Jr	Near A	Night	Night	0.244131
9	Sp v Jr	No pref	Night	Night	0.507042
9	Sp v Jr	Near B	Night	Night	0.248826
9	Sp v Jr	On B	Night	Night	0
10	Sp v Jr	On A	Night	Day	0
10	Sp v Jr	Near A	Night	Day	0.056338
10	Sp v Jr	No pref	Night	Day	0.462441
10	Sp v Jr	Near B	Night	Day	0.481221
10	Sp v Jr	On B	Night	Day	0
10	Sp v Jr	On A	Night	Night	0.00231482
10	Sp v Jr	Near A	Night	Night	0.298611
10	Sp v Jr	No pref	Night	Night	0.361111
10	Sp v Jr	Near B	Night	Night	0.328704
10	Sp v Jr	On B	Night	Night	0.00925926
1	Ds v Jr	On A	Day	Day	0
1	Ds v Jr	Near A	Day	Day	0.327869
1	Ds v Jr	No pref	Day	Day	0.510929
1	Ds v Jr	Near B	Day	Day	0.161202
1	Ds v Jr	On B	Day	Day	0
1	Ds v Jr	On A	Day	Night	0
1	Ds v Jr	Near A	Day	Night	0.130137
1	Ds v Jr	No pref	Day	Night	0.415525
1	Ds v Jr	Near B	Day	Night	0.454338
1	Ds v Jr	On B	Day	Night	0
2	Ds v Jr	On A	Night	Day	0.00222222
2	Ds v Jr	Near A	Night	Day	0.106667
2	Ds v Jr	No pref	Night	Day	0.64
2	Ds v Jr	Near B	Night	Day	0.204444
2	Ds v Jr	On B	Night	Day	0.0466667
2	Ds v Jr	On A	Night	Night	0.0217391
2	Ds v Jr	Near A	Night	Night	0.183575
2	Ds v Jr	No pref	Night	Night	0.405797
2	Ds v Jr	Near B	Night	Night	0.388889
2	Ds v Jr	On B	Night	Night	0
3	Ds v Jr	On A	Day	Day	0
3	Ds v Jr	Near A	Day	Day	0.232394
3	Ds v Jr	No pref	Day	Day	0.43662
3	Ds v Jr	Near B	Day	Day	0.330986
3	Ds v Jr	On B	Day	Day	0
3	Ds v Jr	On A	Day	Night	0
3	Ds v Jr	Near A	Day	Night	0.292237
3	Ds v Jr	No pref	Day	Night	0.0913242
3	Ds v Jr	Near B	Day	Night	0.616438
3	Ds v Jr	On B	Day	Night	0
4	Ds v Jr	On A	Day	Day	0
4	Ds v Jr	Near A	Day	Day	0
4	Ds v Jr	No pref	Day	Day	0.236842
4	Ds v Jr	Near B	Day	Day	0.763158
4	Ds v Jr	On B	Day	Day	0
4	Ds v Jr	On A	Day	Night	0.0172956
4	Ds v Jr	Near A	Day	Night	0.226415
4	Ds v Jr	No pref	Day	Night	0.45283
4	Ds v Jr	Near B	Day	Night	0.303459
4	Ds v Jr	On B	Day	Night	0
5	Ds v Jr	On A	Day	Day	0.0202703
5	Ds v Jr	Near A	Day	Day	0.182432
5	Ds v Jr	No pref	Day	Day	0.277027
5	Ds v Jr	Near B	Day	Day	0.52027
5	Ds v Jr	On B	Day	Day	0
5	Ds v Jr	On A	Day	Night	0.135714
5	Ds v Jr	Near A	Day	Night	0.538095
5	Ds v Jr	No pref	Day	Night	0.0452381
5	Ds v Jr	Near B	Day	Night	0.280952
5	Ds v Jr	On B	Day	Night	0
6	Ds v Jr	On A	Night	Day	0.194836
6	Ds v Jr	Near A	Night	Day	0.401408
6	Ds v Jr	No pref	Night	Day	0.370892
6	Ds v Jr	Near B	Night	Day	0.0328639
6	Ds v Jr	On B	Night	Day	0
6	Ds v Jr	On A	Night	Night	0.0776256
6	Ds v Jr	Near A	Night	Night	0.383562
6	Ds v Jr	No pref	Night	Night	0.251142
6	Ds v Jr	Near B	Night	Night	0.287671
6	Ds v Jr	On B	Night	Night	0
7	Ds v Jr	On A	Night	Day	0
7	Ds v Jr	Near A	Night	Day	0.166667
7	Ds v Jr	No pref	Night	Day	0.316425
7	Ds v Jr	Near B	Night	Day	0.516908
7	Ds v Jr	On B	Night	Day	0
7	Ds v Jr	On A	Night	Night	0.0114155
7	Ds v Jr	Near A	Night	Night	0.0251142
7	Ds v Jr	No pref	Night	Night	0.652968
7	Ds v Jr	Near B	Night	Night	0.303653
7	Ds v Jr	On B	Night	Night	0.00684931
8	Ds v Jr	On A	Day	Day	0.00234742
8	Ds v Jr	Near A	Day	Day	0.300469
8	Ds v Jr	No pref	Day	Day	0.368545
8	Ds v Jr	Near B	Day	Day	0.326291
8	Ds v Jr	On B	Day	Day	0.00234742
8	Ds v Jr	On A	Day	Night	0
8	Ds v Jr	Near A	Day	Night	0.655251
8	Ds v Jr	No pref	Day	Night	0.141553
8	Ds v Jr	Near B	Day	Night	0.203196
8	Ds v Jr	On B	Day	Night	0
9	Ds v Jr	On A	Night	Day	0.00824176
9	Ds v Jr	Near A	Night	Day	0.282967
9	Ds v Jr	No pref	Night	Day	0.184066
9	Ds v Jr	Near B	Night	Day	0.516484
9	Ds v Jr	On B	Night	Day	0.00824176
9	Ds v Jr	On A	Night	Night	0
9	Ds v Jr	Near A	Night	Night	0.140351
9	Ds v Jr	No pref	Night	Night	0.370614
9	Ds v Jr	Near B	Night	Night	0.486842
9	Ds v Jr	On B	Night	Night	0.00219298
10	Ds v Jr	On A	Night	Day	0.0892019
10	Ds v Jr	Near A	Night	Day	0.312207
10	Ds v Jr	No pref	Night	Day	0.204225
10	Ds v Jr	Near B	Night	Day	0.267606
10	Ds v Jr	On B	Night	Day	0.126761
10	Ds v Jr	On A	Night	Night	0.0136986
10	Ds v Jr	Near A	Night	Night	0.228311
10	Ds v Jr	No pref	Night	Night	0.552511
10	Ds v Jr	Near B	Night	Night	0.205479
10	Ds v Jr	On B	Night	Night	0
1	Sa v dowel	On A	Day	Day	0.0347222
1	Sa v dowel	Near A	Day	Day	0.111111
1	Sa v dowel	No pref	Day	Day	0.541667
1	Sa v dowel	Near B	Day	Day	0.3125
1	Sa v dowel	On B	Day	Day	0
1	Sa v dowel	On A	Day	Night	0
1	Sa v dowel	Near A	Day	Night	0.266204
1	Sa v dowel	No pref	Day	Night	0.400463
1	Sa v dowel	Near B	Day	Night	0.333333
1	Sa v dowel	On B	Day	Night	0
2	Sa v dowel	On A	Day	Day	0.0273973
2	Sa v dowel	Near A	Day	Day	0.223744
2	Sa v dowel	No pref	Day	Day	0.493151
2	Sa v dowel	Near B	Day	Day	0.248858
2	Sa v dowel	On B	Day	Day	0.00684931
2	Sa v dowel	On A	Day	Night	0.00704225
2	Sa v dowel	Near A	Day	Night	0.448357
2	Sa v dowel	No pref	Day	Night	0.258216
2	Sa v dowel	Near B	Day	Night	0.286385
2	Sa v dowel	On B	Day	Night	0
3	Sa v dowel	On A	Night	Day	0.6621
3	Sa v dowel	Near A	Night	Day	0.0753425
3	Sa v dowel	No pref	Night	Day	0.0410959
3	Sa v dowel	Near B	Night	Day	0.221461
3	Sa v dowel	On B	Night	Day	0
3	Sa v dowel	On A	Night	Night	0.0892019
3	Sa v dowel	Near A	Night	Night	0.178404
3	Sa v dowel	No pref	Night	Night	0.392019
3	Sa v dowel	Near B	Night	Night	0.340376
3	Sa v dowel	On B	Night	Night	0
4	Sa v dowel	On A	Day	Day	0.0350877
4	Sa v dowel	Near A	Day	Day	0.122807
4	Sa v dowel	No pref	Day	Day	0.842105
4	Sa v dowel	Near B	Day	Day	0
4	Sa v dowel	On B	Day	Day	0
4	Sa v dowel	On A	Day	Night	0.216981
4	Sa v dowel	Near A	Day	Night	0.180818
4	Sa v dowel	No pref	Day	Night	0.240566
4	Sa v dowel	Near B	Day	Night	0.361635
4	Sa v dowel	On B	Day	Night	0
5	Sa v dowel	On A	Day	Day	0.171296
5	Sa v dowel	Near A	Day	Day	0.185185
5	Sa v dowel	No pref	Day	Day	0.12037
5	Sa v dowel	Near B	Day	Day	0.509259
5	Sa v dowel	On B	Day	Day	0.0138889
5	Sa v dowel	On A	Day	Night	0.134259
5	Sa v dowel	Near A	Day	Night	0.152778
5	Sa v dowel	No pref	Day	Night	0.0347222
5	Sa v dowel	Near B	Day	Night	0.675926
5	Sa v dowel	On B	Day	Night	0.00231482
1	Sp v dowel	On A	Day	Day	0
1	Sp v dowel	Near A	Day	Day	0.125969
1	Sp v dowel	No pref	Day	Day	0.27907
1	Sp v dowel	Near B	Day	Day	0.594961
1	Sp v dowel	On B	Day	Day	0
1	Sp v dowel	On A	Day	Night	0.0402299
1	Sp v dowel	Near A	Day	Night	0.45977
1	Sp v dowel	No pref	Day	Night	0.448276
1	Sp v dowel	Near B	Day	Night	0.0488506
1	Sp v dowel	On B	Day	Night	0.00287356
2	Sp v dowel	On A	Day	Day	0.068306
2	Sp v dowel	Near A	Day	Day	0.636612
2	Sp v dowel	No pref	Day	Day	0.0628415
2	Sp v dowel	Near B	Day	Day	0.23224
2	Sp v dowel	On B	Day	Day	0
2	Sp v dowel	On A	Day	Night	0.00200803
2	Sp v dowel	Near A	Day	Night	0.475904
2	Sp v dowel	No pref	Day	Night	0.25502
2	Sp v dowel	Near B	Day	Night	0.267068
2	Sp v dowel	On B	Day	Night	0
3	Sp v dowel	On A	Night	Day	0
3	Sp v dowel	Near A	Night	Day	0
3	Sp v dowel	No pref	Night	Day	0
3	Sp v dowel	Near B	Night	Day	0
3	Sp v dowel	On B	Night	Day	0
3	Sp v dowel	On A	Night	Night	0
3	Sp v dowel	Near A	Night	Night	0
3	Sp v dowel	No pref	Night	Night	0
3	Sp v dowel	Near B	Night	Night	0
3	Sp v dowel	On B	Night	Night	0
4	Sp v dowel	On A	Day	Day	0
4	Sp v dowel	Near A	Day	Day	0.43018
4	Sp v dowel	No pref	Day	Day	0.204955
4	Sp v dowel	Near B	Day	Day	0.364865
4	Sp v dowel	On B	Day	Day	0
4	Sp v dowel	On A	Day	Night	0
4	Sp v dowel	Near A	Day	Night	0.157143
4	Sp v dowel	No pref	Day	Night	0.130952
4	Sp v dowel	Near B	Day	Night	0.711905
4	Sp v dowel	On B	Day	Night	0
5	Sp v dowel	On A	Day	Day	0.00225225
5	Sp v dowel	Near A	Day	Day	0.252252
5	Sp v dowel	No pref	Day	Day	0.213964
5	Sp v dowel	Near B	Day	Day	0.531532
5	Sp v dowel	On B	Day	Day	0
5	Sp v dowel	On A	Day	Night	0
5	Sp v dowel	Near A	Day	Night	0.219048
5	Sp v dowel	No pref	Day	Night	0.209524
5	Sp v dowel	Near B	Day	Night	0.571429
5	Sp v dowel	On B	Day	Night	0
1	Ds v dowel	On A	Day	Day	0
1	Ds v dowel	Near A	Day	Day	0.0968992
1	Ds v dowel	No pref	Day	Day	0.385659
1	Ds v dowel	Near B	Day	Day	0.513566
1	Ds v dowel	On B	Day	Day	0.00387597
1	Ds v dowel	On A	Day	Night	0.0114943
1	Ds v dowel	Near A	Day	Night	0.293103
1	Ds v dowel	No pref	Day	Night	0.344828
1	Ds v dowel	Near B	Day	Night	0.336207
1	Ds v dowel	On B	Day	Night	0.0143678
2	Ds v dowel	On A	Night	Day	0
2	Ds v dowel	Near A	Night	Day	0.122066
2	Ds v dowel	No pref	Night	Day	0.751174
2	Ds v dowel	Near B	Night	Day	0.126761
2	Ds v dowel	On B	Night	Day	0
2	Ds v dowel	On A	Night	Night	0
2	Ds v dowel	Near A	Night	Night	0.0593607
2	Ds v dowel	No pref	Night	Night	0.5
2	Ds v dowel	Near B	Night	Night	0.440639
2	Ds v dowel	On B	Night	Night	0
3	Ds v dowel	On A	Night	Day	0.0234742
3	Ds v dowel	Near A	Night	Day	0.948357
3	Ds v dowel	No pref	Night	Day	0.00234742
3	Ds v dowel	Near B	Night	Day	0.0187793
3	Ds v dowel	On B	Night	Day	0.00704225
3	Ds v dowel	On A	Night	Night	0
3	Ds v dowel	Near A	Night	Night	0.648402
3	Ds v dowel	No pref	Night	Night	0.242009
3	Ds v dowel	Near B	Night	Night	0.10274
3	Ds v dowel	On B	Night	Night	0.00684931
4	Ds v dowel	On A	Night	Day	0.00938967
4	Ds v dowel	Near A	Night	Day	0.481221
4	Ds v dowel	No pref	Night	Day	0.124413
4	Ds v dowel	Near B	Night	Day	0.384977
4	Ds v dowel	On B	Night	Day	0
4	Ds v dowel	On A	Night	Night	0
4	Ds v dowel	Near A	Night	Night	0.150685
4	Ds v dowel	No pref	Night	Night	0.210046
4	Ds v dowel	Near B	Night	Night	0.639269
4	Ds v dowel	On B	Night	Night	0
5	Ds v dowel	On A	Day	Day	0
5	Ds v dowel	Near A	Day	Day	0.410959
5	Ds v dowel	No pref	Day	Day	0.520548
5	Ds v dowel	Near B	Day	Day	0.06621
5	Ds v dowel	On B	Day	Day	0.00228311
5	Ds v dowel	On A	Day	Night	0
5	Ds v dowel	Near A	Day	Night	0.340376
5	Ds v dowel	No pref	Day	Night	0.431925
5	Ds v dowel	Near B	Day	Night	0.2277
5	Ds v dowel	On B	Day	Night	0
1	Jr v dowel	On A	Day	Day	0
1	Jr v dowel	Near A	Day	Day	0.23062
1	Jr v dowel	No pref	Day	Day	0.0542636
1	Jr v dowel	Near B	Day	Day	0.715116
1	Jr v dowel	On B	Day	Day	0
1	Jr v dowel	On A	Day	Night	0
1	Jr v dowel	Near A	Day	Night	0.318966
1	Jr v dowel	No pref	Day	Night	0.0114943
1	Jr v dowel	Near B	Day	Night	0.66954
1	Jr v dowel	On B	Day	Night	0
2	Jr v dowel	On A	Day	Day	0.125541
2	Jr v dowel	Near A	Day	Day	0.257576
2	Jr v dowel	No pref	Day	Day	0.469697
2	Jr v dowel	Near B	Day	Day	0.140693
2	Jr v dowel	On B	Day	Day	0.00649351
2	Jr v dowel	On A	Day	Night	0
2	Jr v dowel	Near A	Day	Night	0.313433
2	Jr v dowel	No pref	Day	Night	0.350746
2	Jr v dowel	Near B	Day	Night	0.335821
2	Jr v dowel	On B	Day	Night	0
3	Jr v dowel	On A	Night	Day	0.00469484
3	Jr v dowel	Near A	Night	Day	0.584507
3	Jr v dowel	No pref	Night	Day	0.0633803
3	Jr v dowel	Near B	Night	Day	0.340376
3	Jr v dowel	On B	Night	Day	0.00704225
3	Jr v dowel	On A	Night	Night	0
3	Jr v dowel	Near A	Night	Night	0.385845
3	Jr v dowel	No pref	Night	Night	0.271689
3	Jr v dowel	Near B	Night	Night	0.342466
3	Jr v dowel	On B	Night	Night	0
4	Jr v dowel	On A	Night	Day	0.00694444
4	Jr v dowel	Near A	Night	Day	0.446759
4	Jr v dowel	No pref	Night	Day	0.0902778
4	Jr v dowel	Near B	Night	Day	0.456019
4	Jr v dowel	On B	Night	Day	0
4	Jr v dowel	On A	Night	Night	0
4	Jr v dowel	Near A	Night	Night	0.412037
4	Jr v dowel	No pref	Night	Night	0.208333
4	Jr v dowel	Near B	Night	Night	0.37963
4	Jr v dowel	On B	Night	Night	0
5	Jr v dowel	On A	Day	Day	0.0115741
5	Jr v dowel	Near A	Day	Day	0.384259
5	Jr v dowel	No pref	Day	Day	0.43287
5	Jr v dowel	Near B	Day	Day	0.171296
5	Jr v dowel	On B	Day	Day	0
5	Jr v dowel	On A	Day	Night	0
5	Jr v dowel	Near A	Day	Night	0.446759
5	Jr v dowel	No pref	Day	Night	0.319444
5	Jr v dowel	Near B	Day	Night	0.233796
5	Jr v dowel	On B	Day	Night	0
